# Supplementary material for: Particulate Matter from Both Heavy Fuel Oil and Diesel Fuel Shipping Emissions Show Strong Biological Effects on Human Lung Cells at Realistic and Comparable In Vitro Exposure Conditions
Source: PLoS One. 2015 Jun 3;10(6):e0126536. doi: 10.1371/journal.pone.0126536 (PMC4454644; doi:10.1371/journal.pone.0126536)
Supplement: S1 Table — (XLSX) [file pone.0126536.s011.xlsx]

## Sheet: Blatt1
Compound Name	HFO	DF	Ratio
	concentration [µg/m³]	concentration [µg/m³]	HFO/DF
online gas phase parameters
Sulfur dioxide	4210	405	10.4
Nitrogen oxides (NOₓ)	3520	9780	0.359
Total hydrocarbons	628	2250	0.279
Carbon monoxide	1040	3770	0.276
Benzene	1.8	6.5	0.277
Butadiene	4.7	20.8	0.226
Phenol	1.2	8.75	0.137
Alkylated benzenes	9.7	98.3	0.0987
Compound Classes and Summed Values
Sulfate	92.2	0.825	112
Σ Hopanes	0.643	0.154	4.17
Σ PAH	0.222	0.0709	3.13
Organic Matter	316	137	2.31
Particulate Mass (PM2.5)	757	388	1.95
Σ Alkylated phenanthrens	0.486	0.425	1.15
Σ n-alkanes	2.73	2.45	1.11
Organic Carbon	364	248	1.47
Total Carbon	386	476	0.81
Σ oxygenated PAH and Oxaarenes	0.16	0.216	0.739
Black Carbon (optical)	78	130	0.6
Elemental Carbon	22.2	228	0.0974
GCxGC (Σ intensities)	4.72E+12**	1.23E+09**	3850
OC I (REMPI, Σ intensities)	9.76E-10**	1.49E-11**	65.5
OC II (REMPI, Σ intensities)	4.97E-10**	1.62E-11**	30.6
Thiaarenes (Σ peaks)	7.40E+01***	4.00E+00***	18.5
OC I (SPI, Σ intensities)	7.81E-12***	4.41E-13***	17.7
Thiaarenes (Σ intensities)	2.33E-02**	2.41E-03**	9.65
ESI+ (Σ formulas)	3.88E+03***	5.65E+02***	6.86
OC II (SPI, Σ intensities)	4.70E-13***	7.43E-14**	6.32
OC I (REMPI, Σ peaks)	2.21E+02***	6.20E+01***	3.56
OC II (REMPI, Σ peaks)	2.31E+02***	7.60E+01***	3.04
OC II (SPI, Σ peaks)	1.45E+02***	5.00E+01***	2.9
OC I (SPI, Σ peaks )	2.80E+02***	1.03E+02***	2.72
GCxGC (Σ peaks)	2.99E+03***	1.64E+03***	1.82
APCI (Σ formulas)	1.43E+03***	8.84E+02***	1.62
Polycyclic Aromatic Hydrocarbons
Σ Benzofluoranthenes*	0.0112	5.74e-05	195
Benze[e]pyrene	0.0159	0.00107	14.9
Benz[a]anthracene-7,12-dione*	0.00535	0.000387	13.8
Benzo[ghi]perylene*	0.00546	0.00041	13.3
Dibenz[ah]anthracene*	0.00309	0.000246	12.6
Indeno[1,2,3-cd]pyrene*	0.00365	0.00041	8.91
Chrysene	0.0895	0.0134	6.68
Benz[a]anthracene	0.0125	0.00265	4.71
Benz[a]pyrene*	0.00317	0.000902	3.51
7H-Benz[de]anthracen-7-one	0.00581	0.00176	3.3
2-Methylphenanthren	0.116	0.0407	2.84
3-Methylchrysene	0.133	0.0504	2.64
Coronene*	0.0016	0.000615	2.6
9-Methylphenanthren	0.0616	0.0245	2.51
Perylene*	0.00122	0.000492	2.48
3-Methylphenanthren	0.0709	0.0291	2.44
1-Nitropyrene	0.00029	0.000175	1.66
Fluoranthene	0.0476	0.032	1.49
Pyrene	0.0276	0.0219	1.26
1-Methylphenanthren	0.106	0.0903	1.17
Cyclopenta[def]phenanthrenone	0.00567	0.005	1.13
4-Methylpyrene	0.0565	0.0687	0.822
1,7-Dimethylphenanthren	0.0951	0.116	0.82
9H-Fluoren-9-one	0.0316	0.039	0.81
1-Methylpyrene	0.0434	0.0594	0.73
9,10-Anthracenedione	0.0915	0.138	0.665
3-Nitrophenanthrene	0.000342	0.000698	0.49
2-Methylantracene	0.0258	0.0684	0.377
6-Methylchrysene	0.0586	0.184	0.319
1,6-Dimethylnaphthalene	0.0108	0.0422	0.256
1,2-Dimethylnaphthalene	0.00979	0.0389	0.252
2,6-Dimethylnaphthalene	0.0118	0.0468	0.252
1-Methylnaphthalene	0.00985	0.0442	0.223
2-Methylnaphthalene	0.0111	0.0499	0.223
Alkanes and Hopanes
Tetratriacontane *	0.0303	0.00041	73.8
Tritriacontane	0.0505	0.000941	53.6
17α(H)-22,29,30-Trisnorhopan *	0.041	0.00082	50.1
18α(H)-22,29,30-Trisnorneohopan *	0.0214	0.00082	26.1
Dotriacontane	0.0579	0.00551	10.5
17β (H)-22,29,30-Trisnorhopan *	0.00704	0.00082	8.58
17β (H),21α(H)-Hopan (Moretan) *	0.00627	0.00082	7.64
Hentriacontane	0.0519	0.00729	7.12
Heptacosane	0.183	0.0298	6.14
Nonacosane	0.12	0.0196	6.12
17β (H),21α (H) 30 Norhopan *	0.00488	0.00082	5.95
Pentacosane	0.191	0.0357	5.34
Triacontane	0.0741	0.0142	5.21
17α (H),21β(H)-30-Norhopan	0.138	0.0352	3.91
17α (H),21β (H)-Hopan (Hopan)	0.163	0.0425	3.83
22R-17α (H),21β (H)-Bishomohopan	0.0456	0.0119	3.83
22S-17α (H),21β (H)-Homohopan	0.0922	0.0261	3.53
22S-17α(H),21β (H)-Bishomohopan	0.0583	0.0176	3.32
22R-17α(H),21β (H)-Homohopan	0.0671	0.0212	3.17
Tetracosane	0.189	0.0719	2.63
Tricosane	0.161	0.0908	1.77
Docosane	0.306	0.252	1.21
Octadecane	0.198	0.169	1.17
Nonadecane	0.341	0.375	0.908
Eicosane	0.469	0.822	0.571
Heneicosane	0.309	0.558	0.555
Carbonyl Compounds
Formaldehyde	5.55	5.9	0.941
Acetaldehyde	1.5	0.96	1.56
Propanal	0.26	0.22	1.18
Isobutanal	0.04	0.11	0.364
Butanal	0.18	0.19	0.947
Isopentanal	0.04	0.08	0.5
Pentanal	0.11	0.12	0.917
Hexanal	0.12	0.8	1.5
Octanal	0.37	0.11	3.36
Nonanal	0.2	0.04	5
Crotonaldehyde	0.43	0.4	1.08
Acrolein	0.91	1.7	0.54
Elements
Titanium	0.00993	0.077	0.129
Cobalt*	0.0113	0.0411	0.275
Tin	0.0154	0.0554	0.278
Molybenum*	0.0135	0.0476	0.282
Selenium	0.0352	0.119	0.295
Chromium	0.0313	0.106	0.295
Cadmium*	0.00733	0.0211	0.347
Potassium*	0.451	0.91	0.496
Sodium*	0.777	1.37	0.568
Aluminium	0.347	0.581	0.598
Magnesium*	1.11	1.03	1.08
Clacium	3.67	2.32	1.58
Strontium*	0.0462	0.0186	2.49
Phosphorus*	2.82	1.11	2.55
Lead	0.112	0.0425	2.63
Zinc	1.82	0.357	5.09
Copper	0.478	0.0916	5.22
Manganese	0.192	0.0243	7.88
Iron	6.99	0.861	8.11
Sulfur	25.6	1.28	20
Barium	0.639	0.0277	23.1
Nickel	2.68	0.0979	27.4
Vanadium	10.5	0.179	58.9
