# Supplementary material for: Particulate Matter from Both Heavy Fuel Oil and Diesel Fuel Shipping Emissions Show Strong Biological Effects on Human Lung Cells at Realistic and Comparable In Vitro Exposure Conditions
Source: PLoS One. 2015 Jun 3;10(6):e0126536. doi: 10.1371/journal.pone.0126536 (PMC4454644; doi:10.1371/journal.pone.0126536)
Supplement: S2 Table — (XLSX) [file pone.0126536.s012.xlsx]

## Sheet: summary
Effect	DF	HFO
Inflammation		Trans pathways: cytokines and inflammatory response é, toll-like receptor signaling pathwayé, TNF alpha signaling pathwayé;
		Trans GO: Cytokine activityé, cytokine-mediated signaling pathwayé, inflammatory responseé, chemokine activityé,
		Genesé: BMP4, CSF3, CXCL1, IL6, CCL2, IL8, CXCL3, CXCL2, CD70, TNFSF9, LIF, CCL20, IL1B, AREG, IL1A, KLF6, EREG, NFKBIZ, S100A8, FOS, CXCR4, PTX3, JUN, NFKBIA, NFKBIE, TNFAIP3, BIRC3
		Met: glycolysisé
Oxidative Stress	Prot GO:response to oxidative stressé	Trans pathway: oxidative stressé;
	Proteinsé: HMOX1, EP300	Trans GO: response to reactive oxygen speciesé, response to hydrogen peroxideé
		Genesé: CYP1A1, FOS, JUNB, DUSP1, JUN, FOSL1, DDIT3
		Prot GO: response to oxidative stressé,
		Proteinsé: PNKP, NDUFS2
Response to chemicals	Trans GO: response to organic substanceê, response to toxinê, zinc ion bindingê, cadmium ion bindingé,	Trans GO: response to organic substanceé, response to organic cyclic compoundé, response to inorganic substanceé, response to organic nitrogené, response to oxygen levelsé, response to hypoxiaé,
	Geneé: MT1M, MT1X, MT1F	Genesé: CCL2, PGF, NFKBIA, HSPA1A, HSPA1B, TRIB1, HSPA1L, HSPH1, FOS, CDKN2B, HSPA2, DNAJA1, IL1B, FOSL1, MYC, CYR61, EGR1, BMP4, IL6, EGR2, CYP1A1, SOCS3, KLF10, NR4A2, NR4A3, JUNB, DDIT3, CD83, CDKN1A, ID2, DUSP1, ADM, ID1, JUN, HSPA4L, PDGFRA, ADRA1B, ID3, DNAJB1, PPP1R15A
	Prot GO: response to inorganic substanceé
	Proteinsé: HMOX1, APOB, EP300
Energy metabolism	Trans GO: respiratory electron transport chainé, oxydative phosphorylationé, energy derivation by oxidation of organic compoundsé,
	Genesé: NDUFB3, NDUFB4, ND1, NDUFA3, ND4, ND5, ND2, NDUFA7, ND3, CYTB, NDUFB1, COX3, ATP8, ATP6, ATP6V1F, ATP5I, PRKAG3
	Prot GO: respiratory electron transport chainê,
	Proteinsê: NDUFB5, ATP6, NDUFB6
	Met: Oxidative glucose metabolism through the TCA cycleê, Glucose-based glycine metabolismé
Translation in protein synthesis	Trans pathway: translation factorsê,
	Genesê: EEF2, ETF1, PABPC1, EIF4G1, EIF1AX, KIAA0664, EIF3S10, EIF5
	Prot GO: Translationê, translational initiatonê, translational elongationê
	Proteinsê: RPS27, RPL37, RPL27, RPL21, RPL18, RPS13, RPS6, RPS29, RPL9, LARS2, RPS11, RPS16, RPL17, RPS20, RPL31, RPS18, RPS3, RPS28, RPS8, RPL39, RPS15, RPS9, RPS4, RPS2, POLG2, RPL34, RPL22, RPL37, RPS17, FAU, RPL26, LARS, RPS15, RPS10
Protein degradation	Trans GO: ubiquitin-dependent protein catabolic processê,
	Genesê: USP7, USP40, KIAA0368, C10ORF46, EDEM1, RNF6, HSP90B1, VCP, SQSTM1, PSMD1, PSMD2, USP22, USP34, RNF20, USP14
	Met: protein digestion and absorption (KEGG pathway), intracellular amino acid amountsé
RNA metabolism	Trans pathway: processing of capped intron-containing pre-mRNAê, mRNA processingê,	Trans GO: positive and negative regulation of RNA metabolic processé,
	Genesê: HNRNPH1, FUS, SMC1, SRSF6, DHX38	Genesé: ABLIM2, NFKBIA, CITED2, LIF, FOS, GATA6, BCL3, MYC, FOSL1, EGR1, BMP4, KLF6, IL6, EGR2, GSX1, NR4A2, NR4A1, NR4A3, JUNB, HES1, DLX2, ADRB2, HES5, JUN, CSRNP1, IRF1, KLF4
	Prot GO: mRNA processingê, leucyl-tRNA aminoacetylationê, rRNA processingê, ncRNA processingê
	Proteinsê: RPL36A, PHF5A, USP39, LSM2, LSM4, LARS, LARS2, RPS16, RPS17, IMP4, RPL26, RPS28, RPS15, RPS6, DIMT1
Chromatin organization and modification	Trans GO: DNA packagingé, chromatin organizationé,
	Genesé: HIST4H4, HIST2H2AA4, HIST2H4B, HIST1H2BO, HIST2H2AB, HIST1H2BM, HIST1H2BN, HIST1H2BK, HIST1H2BL, HIST1H2BI, HIST2H2AC, HIST1H2BJ, HIST3H2A, TLK2, HIST3H2BB, HIST1H1E, HIST1H1D, HIST1H1C, HIST1H1B, HIST1H1A, BANP, TAF6L, HIST2H2BE, HIST2H2BF, HIST1H2AB, HIST1H2AC, DPF3, H1FNT, HIST1H4K, HIST1H2AA, HIST1H2AD, HIST1H2AE, HIST1H4A, CENPA, HIST1H4F, ACTL6B, HIST1H4I, HIST1H4J, HIST1H4H, HIST2H…
	Prot GO: chromatin organizationé, histone modificationé, covalent chromatin modificationé
	Proteins: HIST1H1E, PHB, EP300, HIST1H1C, RNF20, CTR9, CHAF1B
Cell junction and adhesion	Trans pathway: Integrin-mediated cell adhesionê, focal adhesionê, Trans GO: cell junction organizationê,
	Genesê: PDPK1, NF2, TGFB3, STRN, ITGB3, VCL
	Prot GO: cell junction organizationé, cell adhesioné, biological adhesioné, cell junction assemblyé, cell-substrate adhesioné
	Proteins: PARD6B, TLN2, LAMC1, PKP3, ITGB5, LAMB1, LGALS3BP
Endocytosis	Prot KEGG: endocytosis	Prot KEGG: endocytosis
	Prot GO: endocytosisé	Prot GO: endosome organizationé, regulation of endocytosisé
	Proteinsé: EHD2, LRP1	Proteinsé: RAB5B, RAB5C
Cell homeostasis		Prot GO: homeostatic processé, cellular chemical homeostasisé, cellular ion homeostasisé, cation homeostasisé, cellular iron ion homeostasisé, cellular cation homeostasis
		Proteinsé: SOAT1, TFRC, LIPC, FTL, SCO1
Cellular stress response	Prot GO: response to woundingé,	Trans GO: response to woundingé, response to temperatur stimulusé, response to heaté,response to coldé, response to mechanical stimulusé
	Proteinsé: MGLL, CCNB1, HMOX1	Genesé: CXCL1, KLF6, NFKBIZ, IL6, CCL2, CYP1A1, IL8, S100A8, CXCL3, CXCL2, PLAUR, FOS, ADM, CCL20, EREG, CXCR4, CTGF, PDGFRA, HBEGF, IL1B, ID3, PTX3, IL1A, HSPA1L, ADRB2, SOCS3, IL1B, BMP4, JUN, FOSL1, MYC, JUNB
Cellular signaling	Trans pathway: MAPK signalingê, interleukin-11 signaling pathwayê, androgen receptor signaling pathway ê, EGF-EGFR signaling pathwayê, TGF beta signaling pathwayê, platelet-derived growth factor signalingê, ErbB signaling pathwayê, Wnt signaling pathwayê, ID signaling pathwayé,	Trans GO: positive regulation of MAPKKK cascadeé, cell surface receptor linked signaling transductioné, TGF beta receptor signaling pathwayé, platelet-derived growth factor receptor signalingé, epidermal growth factor receptor signaling pathwayé, regulation of G-protein coupled receptor protein signaling pathwayé,
	Trans GO: steroid hormone receptor signalingê,	Genesé: LIF, ADRB2, IL6, IL1B, CXCL1, CCL2, EFNA1, CXCL3, CXCL2, OR52A5, EDN1, TIPARP, NFKBIA, LIF, FOS, HEY1, CCL20, CXCR4, CTGF, BMP4, IL8, GNB1L, PTGER4, KLF10, HES7, GEM, BIRC3, DKK1, EREG, ADM, ID1, JMJD6, JUN, CSRNP1, ADRA1B, PDGFRA, HBEGF, AREG, RASD1, FOS, ID1, HBEGF, AREG, RGS2, EDN1, RGS16
	Genesé: ID1, ID2, ID3	Prot GO: smallGTPase mediated signal transductioné,
	Prot GO: positive regulation of protein kinase cascadeé,	Proteinsé: IQGAP3, RHOG, RAB5B, RAB5C
	Proteinsé: TRADD, HMOX
Motility	Trans GO: cell chemotaxisé, locomotory behavioré,	Trans GO: cell chemotaxisé, cell motilityé, localization of cellé,
	Genes: CCL2, SAA2, IL16, CXCL16, CKLF, S100A9, AVP, GNAO1, TH, ATP1A3, CCL15, CCL24, PTGDS, LTB4R2, CACNA1C, XCR1, QRFP, RASD2, CHAT, PTAFR	Genesé: IL6, CCL2, IL8, CXCL3, IL1B, CXCR4, ID1, CTGF, DNAJA1, NR4A2, HBEGF
	Prot GO: regulation of cell motioné, regulation of locomotioné, regulation of cell migrationé, cell motioné
	Proteinsé: RNF20, LAMB1, HMOX1, PARD6B, APOB, LAMC1
Proliferation	Trans GO: cell cycleê,	Trans GO: positive and negative regulation of cell proliferationé, positive regulation of cell cycleé, G2/M transition of mitotic cell cycleé, positive regulation of DNA replicationé,
	Genesê: E2F2, CLSPN, MLL, EP300, MKI67, E2F7, PCNT, GSPT2, CENPF, ZNF318, MDM4, SMC1A	Genesé: CXCL1, CSF3, CCL2, PGF, EDN1, NFKBIA, TRIB1, LIF, CDKN2B, IL1B, ING1, MYC, FOSL1, IL1A, BMP4, IL6, IL8, EGR4, KLF10, HES1, CDKN1A, ADRB2, ATF3, EREG, ID2, ADM, JUN, PDGFRA, HBEGF, KLF4, CDKN1A, GADD45A, AREG
Cell death	Trans pathway: apoptosis modulation and signalingéê, execution phase of apoptosisê,	Trans GO: regulation of cell deathé, regulation of apoptotic processé, positive and negative regulation of cell death é, negative regulation of apoptotic processé, positive regulation of apoptosisé, positive regulation of anti-apoptosisé,
	Genesé: NFKBIA, BCL2A1, CRADD, FOS, FADD	Genesé: IER3, CCL2, CBX4, NFKBIA, CD70, HSPA1A, HSPA1B, CITED2, MOAP1, BAG3, IL1B, BCL3, MYC, FOSL1, DEDD2, IL1A, ANGPTL4, PHLDA1, BMP4, IL6, SOCS3, KLF10, NR4A2, NR4A1, BIRC3, DDIT3, CDKN1A, ADRB2, DUSP1, JUN, ID3, TNFAIP3, ADM
	Prot GO: induction of apoptosis by intracellular signalsê,

## Sheet: transcriptome
Fuel	Process	Term	-log_10_pval.up	-log_10_pval.down
HFO	BP	GO:0045941~positive regulation of transcription	12.4098	1.1299
HFO	BP	GO:0010628~positive regulation of gene expression	12.069	1.0768
HFO	BP	GO:0010604~positive regulation of macromolecule metabolic process	11.6455	NA
HFO	BP	GO:0045944~positive regulation of transcription from RNA polymerase II promoter	12.8048	1.9805
HFO	BP	GO:0006357~regulation of transcription from RNA polymerase II promoter	13.8303	1.3337
HFO	BP	GO:0051789~response to protein stimulus	13.0147	NA
HFO	BP	GO:0045935~positive regulation of nucleobase, nucleoside, nucleotide and nucleic acid metabolic process	13.528	NA
HFO	BP	GO:0031328~positive regulation of cellular biosynthetic process	15.3776	NA
HFO	BP	GO:0009891~positive regulation of biosynthetic process	15.2181	NA
HFO	BP	GO:0051173~positive regulation of nitrogen compound metabolic process	15.5726	NA
HFO	BP	GO:0010557~positive regulation of macromolecule biosynthetic process	14.4822	NA
HFO	BP	GO:0010033~response to organic substance	14.7087	NA
HFO	BP	GO:0048514~blood vessel morphogenesis	10.3418	NA
HFO	BP	GO:0001568~blood vessel development	10.1739	NA
HFO	BP	GO:0001944~vasculature development	9.9925	NA
HFO	BP	GO:0051726~regulation of cell cycle	9.5744	NA
HFO	BP	GO:0051254~positive regulation of RNA metabolic process	10.2445	1.4321
HFO	BP	GO:0045893~positive regulation of transcription, DNA-dependent	10.3245	1.4487
HFO	CC	GO:0044451~nucleoplasm part	1.0113	5.0824
HFO	CC	GO:0005654~nucleoplasm	NA	5.0185
HFO	CC	GO:0043233~organelle lumen	1.2999	4.3506
HFO	CC	GO:0031974~membrane-enclosed lumen	1.2224	4.2229
HFO	CC	GO:0070013~intracellular organelle lumen	1.3929	4.5006
HFO	CC	GO:0031981~nuclear lumen	1.7396	4.6882
HFO	CC	GO:0035097~histone methyltransferase complex	NA	2.3669
HFO	CC	GO:0034708~methyltransferase complex	NA	2.3669
HFO	CC	GO:0005667~transcription factor complex	1.4862	2.5236
HFO	CC	GO:0044421~extracellular region part	4.347	NA
HFO	CC	GO:0005615~extracellular space	6.0056	NA
HFO	CC	GO:0005576~extracellular region	2.086	NA
HFO	CC	GO:0000785~chromatin	2.818	NA
HFO	MF	GO:0005125~cytokine activity	7.5174	NA
HFO	MF	GO:0003700~transcription factor activity	7.2324	NA
HFO	MF	GO:0030528~transcription regulator activity	8.1337	NA
HFO	MF	GO:0008083~growth factor activity	5.7961	NA
HFO	MF	GO:0046983~protein dimerization activity	3.0315	NA
HFO	MF	GO:0016563~transcription activator activity	3.2242	NA
HFO	MF	GO:0033549~MAP kinase phosphatase activity	3.462	NA
HFO	MF	GO:0017017~MAP kinase tyrosine/serine/threonine phosphatase activity	3.462	NA
HFO	MF	GO:0043565~sequence-specific DNA binding	3.9202	NA
HFO	MF	GO:0008009~chemokine activity	3.8415	NA
HFO	MF	GO:0003690~double-stranded DNA binding	4.0203	NA
HFO	MF	GO:0042379~chemokine receptor binding	3.7096	NA
HFO	MF	GO:0016564~transcription repressor activity	3.714	NA
HFO	MF	GO:0046914~transition metal ion binding	NA	5.3559
HFO	MF	GO:0008270~zinc ion binding	NA	7.0496
HFO	MF	GO:0003677~DNA binding	2.9801	5.478
DF	BP	GO:0022904~respiratory electron transport chain	4.91	NA
DF	BP	GO:0006120~mitochondrial electron transport, NADH to ubiquinone	4.9232	NA
DF	BP	GO:0006119~oxidative phosphorylation	4.4328	NA
DF	BP	GO:0042775~mitochondrial ATP synthesis coupled electron transport	5.4983	NA
DF	BP	GO:0042773~ATP synthesis coupled electron transport	5.4983	NA
DF	BP	GO:0065003~macromolecular complex assembly	6.5475	NA
DF	BP	GO:0051276~chromosome organization	6.7665	NA
DF	BP	GO:0043933~macromolecular complex subunit organization	6.0685	NA
DF	BP	GO:0034622~cellular macromolecular complex assembly	9.8647	NA
DF	BP	GO:0034621~cellular macromolecular complex subunit organization	9.5495	1.1754
DF	BP	GO:0006325~chromatin organization	8.2948	NA
DF	BP	GO:0006333~chromatin assembly or disassembly	16.3737	NA
DF	BP	GO:0006323~DNA packaging	18.4642	NA
DF	BP	GO:0034728~nucleosome organization	20.6055	NA
DF	BP	GO:0031497~chromatin assembly	20.3895	NA
DF	BP	GO:0006334~nucleosome assembly	20.8815	NA
DF	BP	GO:0065004~protein-DNA complex assembly	19.7677	NA
DF	CC	GO:0044427~chromosomal part	7.8432	NA
DF	CC	GO:0005694~chromosome	6.2612	NA
DF	CC	GO:0030964~NADH dehydrogenase complex	4.7135	NA
DF	CC	GO:0005747~mitochondrial respiratory chain complex I	4.7135	NA
DF	CC	GO:0045271~respiratory chain complex I	4.7135	NA
DF	CC	GO:0005746~mitochondrial respiratory chain	4.6652	NA
DF	CC	GO:0044455~mitochondrial membrane part	4.7919	NA
DF	CC	GO:0070469~respiratory chain	4.0071	NA
DF	CC	GO:0031981~nuclear lumen	NA	4.4632
DF	CC	GO:0031974~membrane-enclosed lumen	NA	4.0888
DF	CC	GO:0043232~intracellular non-membrane-bounded organelle	NA	4.8962
DF	CC	GO:0043228~non-membrane-bounded organelle	NA	4.8962
DF	CC	GO:0005730~nucleolus	NA	5.1678
DF	CC	GO:0005829~cytosol	NA	6.0029
DF	CC	GO:0032993~protein-DNA complex	23.3777	NA
DF	CC	GO:0000786~nucleosome	25.8093	NA
DF	CC	GO:0000785~chromatin	13.8356	NA
DF	MF	GO:0016655~oxidoreductase activity, acting on NADH or NADPH, quinone or similar compound as acceptor	4.3545	NA
DF	MF	GO:0016651~oxidoreductase activity, acting on NADH or NADPH	3.834	NA
DF	MF	GO:0004857~enzyme inhibitor activity	3.2475	NA
DF	MF	GO:0008137~NADH dehydrogenase (ubiquinone) activity	4.8348	NA
DF	MF	GO:0003954~NADH dehydrogenase activity	4.8348	NA
DF	MF	GO:0050136~NADH dehydrogenase (quinone) activity	4.8348	NA
DF	MF	GO:0019901~protein kinase binding	NA	3.3882
DF	MF	GO:0019900~kinase binding	NA	3.5669
DF	MF	GO:0019899~enzyme binding	NA	3.0762
DF	MF	GO:0003723~RNA binding	NA	3.1706

## Sheet: proteome
Fuel	Process	Term	-log_10_pval.up	-log_10_pval.down
HFO	BP	GO:0006081~cellular aldehyde metabolic process	NA	9.7274
HFO	BP	GO:0006729~tetrahydrobiopterin biosynthetic process	NA	3.70465
HFO	BP	GO:0006873~cellular ion homeostasis	3.56927	0.835423
HFO	BP	GO:0006879~cellular iron ion homeostasis	3.93873	NA
HFO	BP	GO:0007032~endosome organization	4.41098	NA
HFO	BP	GO:0007264~small GTPase mediated signal transduction	4.54608	NA
HFO	BP	GO:0009266~response to temperature stimulus	NA	4.32056
HFO	BP	GO:0009636~response to toxin	NA	4.69102
HFO	BP	GO:0019748~secondary metabolic process	NA	4.10311
HFO	BP	GO:0030003~cellular cation homeostasis	5.0377	NA
HFO	BP	GO:0030005~cellular divalent and trivalent inorganic cation homeostasis	5.3337	NA
HFO	BP	GO:0042592~homeostatic process	4.90623	0.682087
HFO	BP	GO:0046146~tetrahydrobiopterin metabolic process	NA	3.70465
HFO	BP	GO:0048878~chemical homeostasis	5.1767	1.71562
HFO	BP	GO:0051186~cofactor metabolic process	NA	3.56469
HFO	BP	GO:0055066~divalent and trivalent inorganic cation homeostasis	4.94651	NA
HFO	BP	GO:0055080~cation homeostasis	4.61284	NA
HFO	BP	GO:0055082~cellular chemical homeostasis	3.56927	0.835423
HFO	BP	GO:0055114~oxidation reduction	2.96006	10.0225
HFO	CC	GO:0005743~mitochondrial inner membrane	4.10777	NA
HFO	CC	GO:0005829~cytosol	NA	3.91835
HFO	CC	GO:0016021~integral to membrane	5.6231	0.00442135
HFO	CC	GO:0019866~organelle inner membrane	3.71433	NA
HFO	CC	GO:0031090~organelle membrane	4.29617	NA
HFO	CC	GO:0031224~intrinsic to membrane	8.25485	0.00290023
HFO	CC	GO:0031225~anchored to membrane	4.58155	NA
HFO	CC	GO:0042470~melanosome	3.53868	NA
HFO	CC	GO:0048770~pigment granule	3.53868	NA
HFO	MF	GO:0004033~aldo-keto reductase activity	NA	11.6153
HFO	MF	GO:0008374~O-acyltransferase activity	3.5783	NA
HFO	MF	GO:0017070~U6 snRNA binding	0	4.18386
HFO	MF	GO:0048037~cofactor binding	4.49926	0.929834
HFO	KEGG	hsa00100:Steroid biosynthesis	4.22615	0
HFO	KEGG	hsa04144:Endocytosis	4.84527	0
DF	BP	GO:0006325~chromatin organization	4.54803	NA
DF	BP	GO:0006364~rRNA processing	NA	5.31733
DF	BP	GO:0006396~RNA processing	0.0407287	4.02144
DF	BP	GO:0006412~translation	0.00196425	48.0929
DF	BP	GO:0006414~translational elongation	NA	71.4344
DF	BP	GO:0006429~leucyl-tRNA aminoacylation	NA	3.58826
DF	BP	GO:0006513~protein monoubiquitination	3.55744	NA
DF	BP	GO:0007155~cell adhesion	4.94193	NA
DF	BP	GO:0007584~response to nutrient	3.84973	NA
DF	BP	GO:0008629~induction of apoptosis by intracellular signals	NA	5.42268
DF	BP	GO:0008630~DNA damage response, signal transduction resulting in induction of apoptosis	NA	4.24051
DF	BP	GO:0010390~histone monoubiquitination	3.55744	NA
DF	BP	GO:0016072~rRNA metabolic process	NA	5.21513
DF	BP	GO:0016569~covalent chromatin modification	4.85922	NA
DF	BP	GO:0016570~histone modification	4.85922	NA
DF	BP	GO:0022610~biological adhesion	4.85479	NA
DF	BP	GO:0022613~ribonucleoprotein complex biogenesis	0.188881	5.05707
DF	BP	GO:0030323~respiratory tube development	4.04006	NA
DF	BP	GO:0030324~lung development	4.04006	NA
DF	BP	GO:0030334~regulation of cell migration	4.57184	NA
DF	BP	GO:0031589~cell-substrate adhesion	4.04006	NA
DF	BP	GO:0032446~protein modification by small protein conjugation	3.74587	NA
DF	BP	GO:0033523~histone H2B ubiquitination	3.55744	NA
DF	BP	GO:0034329~cell junction assembly	5.96629	NA
DF	BP	GO:0034330~cell junction organization	4.94822	NA
DF	BP	GO:0034383~low-density lipoprotein particle clearance	4.12162	NA
DF	BP	GO:0034470~ncRNA processing	0.378952	5.9216
DF	BP	GO:0034660~ncRNA metabolic process	0.193838	6.46736
DF	BP	GO:0040012~regulation of locomotion	4.31006	NA
DF	BP	GO:0042254~ribosome biogenesis	0.409407	4.76514
DF	BP	GO:0042274~ribosomal small subunit biogenesis	NA	11.5746
DF	BP	GO:0051270~regulation of cell motion	3.95779	NA
DF	BP	GO:0060541~respiratory system development	3.8604	NA
DF	CC	GO:0005576~extracellular region	3.81246	NA
DF	CC	GO:0005578~proteinaceous extracellular matrix	4.61068	NA
DF	CC	GO:0005615~extracellular space	5.03591	NA
DF	CC	GO:0005730~nucleolus	1.28775	4.91325
DF	CC	GO:0005768~endosome	6.4102	1.01013
DF	CC	GO:0005774~vacuolar membrane	3.68858	NA
DF	CC	GO:0005829~cytosol	2.05082	16.9765
DF	CC	GO:0005840~ribosome	0.0685721	54.4222
DF	CC	GO:0005886~plasma membrane	8.03924	0.0524806
DF	CC	GO:0015934~large ribosomal subunit	NA	14.0813
DF	CC	GO:0015935~small ribosomal subunit	0.271055	34.1468
DF	CC	GO:0022625~cytosolic large ribosomal subunit	NA	16.9214
DF	CC	GO:0022626~cytosolic ribosome	NA	63.0682
DF	CC	GO:0022627~cytosolic small ribosomal subunit	NA	44.4631
DF	CC	GO:0030529~ribonucleoprotein complex	0.0194221	37.6614
DF	CC	GO:0031012~extracellular matrix	3.94936	NA
DF	CC	GO:0031226~intrinsic to plasma membrane	4.0859	0.781939
DF	CC	GO:0033279~ribosomal subunit	0.0502736	50.9443
DF	CC	GO:0043228~non-membrane-bounded organelle	0.123647	18.9299
DF	CC	GO:0043232~intracellular non-membrane-bounded organelle	0.123647	18.9299
DF	CC	GO:0044420~extracellular matrix part	4.06005	NA
DF	CC	GO:0044421~extracellular region part	8.43824	NA
DF	CC	GO:0044445~cytosolic part	NA	49.4358
DF	CC	GO:0044459~plasma membrane part	8.65406	0.100615
DF	MF	GO:0003723~RNA binding	0.00118207	12.7452
DF	MF	GO:0003735~structural constituent of ribosome	NA	59.6917
DF	MF	GO:0004823~leucine-tRNA ligase activity	NA	3.51451
DF	MF	GO:0005044~scavenger receptor activity	4.10237	NA
DF	MF	GO:0005198~structural molecule activity	0.0999859	47.8884
DF	MF	GO:0019153~protein-disulfide reductase (glutathione) activity	NA	3.51451
DF	MF	GO:0019843~rRNA binding	NA	9.40574
DF	MF	GO:0019899~enzyme binding	10.614	0.125129
DF	KEGG	hsa03010:Ribosome	0	69.406
DF	KEGG	hsa04144:Endocytosis	5.68191	0.0682682

## Sheet: metabolome
Fuel	KEGG ID	Pathway Name	pValue
HFO	map04973	Carbohydrate digestion and absorption	0.0252101
HFO	map00010	Glycolysis / Gluconeogenesis	0.0252101
HFO	map04066	HIF-1 signaling pathway	0.0252101
HFO	map00240	Pyrimidine metabolism	0.0695187
DF	map00330	Arginine and proline metabolism	0.00396449
DF	map00250	Alanine, aspartate and glutamate metabolism	0.0136555
DF	map00410	beta-Alanine metabolism	0.0436975
DF	map00240	Pyrimidine metabolism	0.0436975
DF	map01230	Biosynthesis of amino acids	0.0751287
DF	map04974	Protein digestion and absorption	0.0751287
DF	map02010	ABC transporters	0.077569
